# Supplementary material for: Nivolumab in pre-treated malignant pleural mesothelioma: real-world data from the Dutch expanded access program
Source: PubMed Central journal article supplement — Transl Lung Cancer Res. 2020 Aug;9(4):1169–79. doi: 10.21037/tlcr-19-686 (PMC7481613; doi:10.21037/tlcr-19-686), 2020-08
Supplement: tlcr-09-04-1169-dss.pdf [file tlcr-09-04-1169-dss.pdf]

| Data Sharing Statement |                                                                                                                                                    |                                                            |
|------------------------|----------------------------------------------------------------------------------------------------------------------------------------------------|------------------------------------------------------------|
| <b>Article Info</b>    | <a href="http://dx.doi.org/10.21037/tlcr-19-686">http://dx.doi.org/10.21037/tlcr-19-686</a>                                                        |                                                            |
| <b>Item</b>            | <b>Question</b>                                                                                                                                    | <b>Authors' Response<br/>(place "-" if not applicable)</b> |
| 1                      | Would you like to share data collected for your study to others?                                                                                   | Yes                                                        |
| 2                      | If not, would you like to share the reason for your decision?                                                                                      | -                                                          |
| 3                      | What data in particular will be shared?                                                                                                            | Dataset collection                                         |
| 4                      | Any other documents will be share? Such as study protocol, statistical analysis plan, informed consent form, clinical study report, analytic code. | Statistical analysis plan                                  |
| 5                      | When will data availability begin?                                                                                                                 | Once the paper is published                                |
| 6                      | When will data availability end?                                                                                                                   | -                                                          |
| 7                      | To whom will you share the data?                                                                                                                   | To the ones who will make a request                        |
| 8                      | For what type of analysis or purpose?                                                                                                              | To share dataset and make analyses on a bigger sample size |
| 9                      | How or where can the data/documents be obtained?                                                                                                   | By mailing the corresponding author                        |
| 10                     | Any other restrictions?                                                                                                                            | -                                                          |
